# Supplementary material for: Morphological variability and genetic diversity in Carex buxbaumii and Carex hartmaniorum (Cyperaceae) populations
Source: PeerJ. 2021 May 11;9:e11372. doi: 10.7717/peerj.11372 (PMC8121068; doi:10.7717/peerj.11372)
Supplement: Supplemental Information 1 [file peerj-09-11372-s001.xlsx]

## Sheet: Arkusz1
Raw data for evaluation of morphological variability of the analyzed populations
Number of specimens	Culm height (cm)	Leaf width (cm)	Inﬂorescence length (cm)	Number of spikes (no)	Uppermost spike length (cm)	Uppermost spike width (cm)	Lowest spike length (cm)	Lowest spike width (cm)	Bract length (cm)	Glume length (mm)	Utricle length (mm)	Utricle beak length (mm)	Population number	Species
1	52.7	0.26	7.16	5	2.51	0.75	2.24	0.69	7.17	3.65	3.35	0.19	1	C. hartmaniorum
2	62.3	0.34	7.5	5	2.72	0.72	2.01	0.7	6.87	4.24	3.36	0.19	1	C. hartmaniorum
3	44.6	0.22	3.97	4	1.87	0.61	1.55	0.57	3.81	3.72	3.32	0.17	1	C. hartmaniorum
4	52.8	0.28	7.67	6	2.07	0.82	2.03	0.67	7.76	4.11	3.31	0.15	1	C. hartmaniorum
5	43.6	0.25	4.51	5	2.09	0.74	2.25	0.65	4.19	3.56	3.25	0.17	1	C. hartmaniorum
6	48.4	0.22	7.53	5	2.02	0.63	1.79	0.53	5.23	3.64	3.05	0.15	1	C. hartmaniorum
7	54.4	0.19	3.97	4	2.03	0.66	1.71	0.55	3.4	3.88	3.36	0.19	1	C. hartmaniorum
8	49.5	0.2	15.8	4	2.47	0.81	2.8	0.6	14.9	4.3	3.29	0.15	1	C. hartmaniorum
9	55.5	0.25	4.42	5	1.96	0.72	1.45	0.6	3.37	3.5	3.43	0.2	1	C. hartmaniorum
10	63.4	0.37	7.89	7	2.69	0.78	3.14	0.72	5.18	4.54	3.41	0.17	1	C. hartmaniorum
11	50.2	0.23	4.23	4	2.14	0.71	1.67	0.7	3.83	3.62	3.32	0.16	1	C. hartmaniorum
12	52.6	0.32	4.41	4	2.32	0.77	1.95	0.72	4.03	3.5	3.2	0.15	1	C. hartmaniorum
13	47.2	0.28	4.45	5	2.15	0.69	1.81	0.63	4.18	3.73	3.27	0.17	1	C. hartmaniorum
14	43.8	0.23	3.77	4	2.02	0.62	1.77	0.68	2.36	3.39	3.13	0.15	1	C. hartmaniorum
15	51.7	0.28	7.01	5	2.22	0.67	2.41	0.61	8.61	3.25	3.16	0.16	1	C. hartmaniorum
16	56.1	0.26	5.08	5	2.32	0.7	1.79	0.67	4.49	3.73	3.18	0.2	1	C. hartmaniorum
17	54.5	0.28	5.92	6	1.98	0.84	2.43	0.73	6.87	3.81	3.28	0.15	1	C. hartmaniorum
18	53	0.27	4.66	5	2.27	0.65	2.05	0.57	2.8	3.34	2.95	0.16	1	C. hartmaniorum
19	64.2	0.24	5.79	7	2.58	0.83	2.29	0.65	6.29	3.36	3.24	0.17	1	C. hartmaniorum
20	51.4	0.21	3.99	4	2.05	0.66	1.8	0.63	2.97	3.34	3.12	0.15	1	C. hartmaniorum
21	48.9	0.27	4.36	5	1.73	0.69	2.17	0.63	2.94	3.35	2.83	0.15	2	C. hartmaniorum
22	51.4	0.26	7.72	4	2.27	0.64	2.52	0.53	6.92	3.39	2.85	0.15	2	C. hartmaniorum
23	52.4	0.25	6.42	5	2.37	0.69	2.67	0.5	5.83	3.53	2.86	0.16	2	C. hartmaniorum
24	48.3	0.23	8.35	4	1.92	0.69	3.36	0.54	7.61	3.84	3.01	0.17	2	C. hartmaniorum
25	48.9	0.27	9.48	4	2.34	0.71	2.73	0.52	8.88	3.66	2.93	0.16	2	C. hartmaniorum
26	47.2	0.26	7.74	4	2.22	0.52	2.57	0.5	5.76	3.53	2.78	0.15	2	C. hartmaniorum
27	46.5	0.24	7.26	4	2.29	0.5	2.34	0.5	5.48	3.32	2.74	0.16	2	C. hartmaniorum
28	47.8	0.26	5.65	4	2.14	0.58	2.01	0.48	5.07	3.33	2.86	0.15	2	C. hartmaniorum
29	48.3	0.26	13.45	5	2.64	0.64	3.05	0.48	12.73	3.35	2.81	0.18	2	C. hartmaniorum
30	50	0.27	5.89	4	2.43	0.73	2.44	0.51	4.76	3.39	3.02	0.17	2	C. hartmaniorum
31	51.2	0.28	7.77	5	2.49	0.58	2.94	0.5	6.44	3.33	2.78	0.18	2	C. hartmaniorum
32	45.6	0.2	7.68	5	2.29	0.6	2.36	0.4	6.41	3.35	2.86	0.17	2	C. hartmaniorum
33	50.1	0.25	6.07	4	2.31	0.62	2.64	0.47	3.55	3.3	2.89	0.16	2	C. hartmaniorum
34	56.8	0.28	7.25	6	2.3	0.67	2.55	0.57	4.71	3.58	3.1	0.18	2	C. hartmaniorum
35	59.8	0.29	5.96	4	1.91	0.69	2.63	0.67	4.46	3.9	2.94	0.21	2	C. hartmaniorum
36	49.1	0.28	10.67	5	2.24	0.67	3.08	0.57	10.74	3.45	2.83	0.17	2	C. hartmaniorum
37	65.1	0.27	6.37	5	2.02	0.62	2.37	0.6	4.14	3.29	2.86	0.16	2	C. hartmaniorum
38	54	0.29	5.85	5	2.15	0.67	2.4	0.66	4.29	3	2.93	0.17	2	C. hartmaniorum
39	62.2	0.29	6.22	4	2.37	0.68	2.45	0.65	3.67	3.35	2.94	0.16	2	C. hartmaniorum
40	65.9	0.3	11.92	5	3.1	0.73	3.13	0.6	11.96	3.84	3.15	0.2	2	C. hartmaniorum
41	61.7	0.3	4.66	4	1.9	0.65	1.97	0.61	3.71	3.25	2.78	0.15	4	C. hartmaniorum
42	61.1	0.31	5.25	5	1.87	0.52	2.06	0.56	3.31	3.56	2.79	0.16	4	C. hartmaniorum
43	58.8	0.29	4.58	5	1.7	0.54	1.97	0.54	3.46	3.14	2.75	0.15	4	C. hartmaniorum
44	65.4	0.22	5.81	5	1.97	0.53	2.39	0.57	5.42	3.2	2.79	0.17	4	C. hartmaniorum
45	66.5	0.28	6.17	4	2.3	0.6	1.58	0.52	5.89	3.11	2.8	0.17	4	C. hartmaniorum
46	64.5	0.33	7.43	5	2.44	0.62	2.65	0.65	6.82	3.35	2.88	0.18	4	C. hartmaniorum
47	60.1	0.32	9.91	6	2.38	0.68	3.05	0.58	9.72	3.2	2.85	0.17	4	C. hartmaniorum
48	65.6	0.33	6.37	5	2.57	0.72	2.58	0.66	5.37	3.24	2.84	0.16	4	C. hartmaniorum
49	66.7	0.35	6.49	6	2.67	0.62	2.99	0.6	5.51	3.48	2.9	0.18	4	C. hartmaniorum
50	52.8	0.28	4.72	4	1.83	0.56	2.01	0.56	4.12	3.14	2.58	0.21	4	C. hartmaniorum
51	58.3	0.25	5.44	4	2.02	0.58	2.08	0.56	3.84	3.22	2.6	0.2	4	C. hartmaniorum
52	55.9	0.27	4.61	5	1.62	0.52	2	0.52	3.72	3.08	2.65	0.19	4	C. hartmaniorum
53	59.1	0.28	5.73	5	2.02	0.55	2.32	0.5	5.55	3.16	2.66	0.2	4	C. hartmaniorum
54	59.8	0.28	6.15	4	2.15	0.58	1.6	0.5	5.75	3.21	2.7	0.21	4	C. hartmaniorum
55	76.7	0.28	5.53	5	2.22	0.66	2.2	0.46	5.42	3.2	2.66	0.18	4	C. hartmaniorum
56	69.3	0.31	5.28	5	2.44	0.6	2.21	0.57	4.16	3.5	2.68	0.21	4	C. hartmaniorum
57	73.2	0.32	5.82	5	2.64	0.66	2.41	0.6	5.59	3.21	2.67	0.19	4	C. hartmaniorum
58	70.2	0.31	5.78	5	2.77	0.63	2.47	0.62	3.8	3.26	2.69	0.2	4	C. hartmaniorum
59	60.3	0.28	6.42	6	2.15	0.62	2.57	0.56	5.95	3.34	2.6	0.19	4	C. hartmaniorum
60	57.4	0.3	5.79	5	2.19	0.65	2.21	0.58	5.47	3.37	2.7	0.19	4	C. hartmaniorum
61	60.9	0.24	9.19	5	2.15	0.55	2.58	0.45	7.97	3.45	2.8	0.19	5	C. hartmaniorum
62	58.2	0.2	9.6	4	2.03	0.56	2.93	0.45	8.99	3.54	2.84	0.19	5	C. hartmaniorum
63	66.9	0.23	8.31	4	2.11	0.62	2.48	0.53	7.17	4.11	2.94	0.15	5	C. hartmaniorum
64	78.1	0.23	7.61	5	2.37	0.58	2.48	0.48	6.06	3.74	2.84	0.2	5	C. hartmaniorum
65	73.6	0.24	8.25	5	2.76	0.6	2.27	0.47	7.57	4.28	3.02	0.2	5	C. hartmaniorum
66	57.3	0.27	6.42	4	2.19	0.38	2.34	0.32	5.56	3.42	2.72	0.17	5	C. hartmaniorum
67	61.6	0.24	11.76	5	2.58	0.64	2.86	0.36	11.17	3.55	2.76	0.19	5	C. hartmaniorum
68	72.9	0.24	6.98	4	2.43	0.53	2.17	0.46	6.88	3.64	2.95	0.2	5	C. hartmaniorum
69	75.9	0.24	7.48	4	1.75	0.57	2.27	0.42	7.41	3.32	2.94	0.18	5	C. hartmaniorum
70	84.2	0.27	10.23	5	2.5	0.46	2.84	0.47	10.22	3.38	2.92	0.19	5	C. hartmaniorum
71	74.3	0.29	7.35	5	2.17	0.58	2.38	0.52	6.42	3.22	2.81	0.19	5	C. hartmaniorum
72	80.3	0.26	8.98	5	2.46	0.54	2.88	0.45	8.12	3.42	2.57	0.18	5	C. hartmaniorum
73	62.4	0.24	6.84	4	2.12	0.62	2.33	0.51	5.17	3.2	2.96	0.22	5	C. hartmaniorum
74	76.7	0.3	7.93	4	2.37	0.49	2.38	0.54	7.86	3.31	2.9	0.17	5	C. hartmaniorum
75	63.8	0.25	7.41	5	2.08	0.58	2.28	0.5	6.43	3.18	2.73	0.21	5	C. hartmaniorum
76	62.5	0.27	6.73	5	2.42	0.52	2.45	0.45	6.28	3.1	2.6	0.16	5	C. hartmaniorum
77	70.1	0.29	13.84	5	2.4	0.66	2.45	0.44	14.85	3.13	2.78	0.2	5	C. hartmaniorum
78	73.8	0.26	6.85	4	2.53	0.6	2.28	0.44	5.07	3.54	2.9	0.19	5	C. hartmaniorum
79	87.2	0.27	6.89	4	2.56	0.65	2.16	0.43	5.36	3.59	2.83	0.18	5	C. hartmaniorum
80	76.2	0.27	12.19	5	2.43	0.61	3.09	0.42	12.3	3.48	3.05	0.19	5	C. hartmaniorum
81	47.2	0.31	7.48	4	2.38	0.68	2.72	0.48	7.55	3.77	3.13	0.2	7	C. hartmaniorum
82	38.9	0.26	7.9	4	2.18	0.6	1.78	0.47	7.87	3.12	2.87	0.23	7	C. hartmaniorum
83	42.1	0.24	5.76	4	2.35	0.66	1.81	0.43	5.38	3.66	2.79	0.21	7	C. hartmaniorum
84	52.9	0.26	6.07	5	1.48	0.65	2.41	0.53	6.37	3.56	3.16	0.21	7	C. hartmaniorum
85	59.9	0.32	6.83	5	2.58	0.66	2.07	0.49	6.87	3.75	2.88	0.17	7	C. hartmaniorum
86	69.8	0.29	10.3	5	2.76	0.73	3.08	0.56	10.46	3.76	2.97	0.24	7	C. hartmaniorum
87	69.2	0.31	7.08	4	2.36	0.73	2.27	0.65	5.56	3.47	2.79	0.19	7	C. hartmaniorum
88	60.6	0.22	4.56	3	2.45	0.66	2.02	0.59	3.9	3.15	2.85	0.26	7	C. hartmaniorum
89	76.5	0.3	6.79	4	2.7	0.58	2.55	0.43	5.65	3.12	2.78	0.16	7	C. hartmaniorum
90	65.7	0.27	4.9	4	2.19	0.68	2.06	0.55	3.14	3.25	3.03	0.18	7	C. hartmaniorum
91	67.9	0.28	7.01	4	2.79	0.62	2.59	0.47	7.04	3.27	2.85	0.17	7	C. hartmaniorum
92	66.2	0.28	6.38	4	2.48	0.75	2.09	0.42	4.53	3.15	2.64	0.19	7	C. hartmaniorum
93	75.5	0.28	6.35	4	2.49	0.64	2.25	0.42	3.94	3.2	2.93	0.19	7	C. hartmaniorum
94	49.8	0.29	5.66	4	2.21	0.64	2.01	0.47	4.39	3.44	2.79	0.18	7	C. hartmaniorum
95	73.1	0.26	6.61	4	2.37	0.58	2.2	0.5	5.47	3.21	2.79	0.16	7	C. hartmaniorum
96	57.7	0.24	4.85	4	1.99	0.55	1.67	0.49	4.18	3.12	2.69	0.2	7	C. hartmaniorum
97	71.7	0.29	8.25	5	2.65	0.56	2.94	0.39	8.25	3.34	2.87	0.22	7	C. hartmaniorum
98	68.3	0.3	13.76	5	2.59	0.6	2.95	0.44	14.39	3.8	2.93	0.2	7	C. hartmaniorum
99	62.9	0.29	5.21	3	2.43	0.64	2.13	0.48	6.02	3.1	2.75	0.19	7	C. hartmaniorum
100	53.2	0.28	4.24	4	1.7	0.57	1.96	0.59	3.84	3.26	2.92	0.22	7	C. hartmaniorum
101	75.8	0.29	8.28	4	2.81	0.5	2.65	0.5	5.65	3.32	2.72	0.18	8	C. hartmaniorum
102	66.6	0.27	8.38	5	2.59	0.53	2.99	0.49	6.96	3.05	2.67	0.16	8	C. hartmaniorum
103	63.1	0.31	9.07	5	3.02	0.57	2.96	0.46	8.14	3.5	2.72	0.17	8	C. hartmaniorum
104	81.2	0.3	11.15	5	2.96	0.67	3.17	0.52	9.58	3.52	3	0.17	8	C. hartmaniorum
105	66.8	0.3	7.3	4	2.94	0.64	2.57	0.54	5.8	3.2	2.84	0.19	8	C. hartmaniorum
106	67.7	0.3	6.91	4	2.69	0.76	2.5	0.59	5.64	3.12	2.81	0.2	8	C. hartmaniorum
107	73.4	0.31	7.83	4	3.12	0.64	2.92	0.5	6.36	3.19	2.71	0.21	8	C. hartmaniorum
108	66.5	0.32	7.91	5	3.1	0.58	2.99	0.6	5.93	3.23	2.77	0.19	8	C. hartmaniorum
109	73.3	0.26	7.99	4	2.06	0.67	2.08	0.47	6.18	3.07	2.75	0.16	8	C. hartmaniorum
110	80.1	0.29	7.07	4	2.4	0.61	2.66	0.5	5.85	3.24	2.84	0.18	8	C. hartmaniorum
111	68.4	0.25	7.77	4	2.59	0.62	2.72	0.43	5.96	3.29	2.77	0.18	8	C. hartmaniorum
112	73.5	0.29	13.17	5	2.87	0.58	3.33	0.5	11.72	3.33	2.75	0.2	8	C. hartmaniorum
113	69.1	0.31	7.08	4	2.79	0.58	2.65	0.48	3.82	3.25	2.72	0.21	8	C. hartmaniorum
114	82.1	0.3	7.49	4	2.78	0.62	2.96	0.49	4.71	3.25	2.93	0.2	8	C. hartmaniorum
115	79.1	0.29	9.12	4	2.98	0.6	2.83	0.58	7.17	3.35	2.87	0.2	8	C. hartmaniorum
116	76.6	0.25	10.98	4	3.05	0.66	1.67	0.55	9.68	3.06	2.8	0.18	8	C. hartmaniorum
117	70.8	0.24	8.76	5	2.19	0.59	2.79	0.4	7.72	3	2.81	0.19	8	C. hartmaniorum
118	75.5	0.24	9.5	5	2.5	0.51	2.74	0.39	8.75	3.05	2.86	0.2	8	C. hartmaniorum
119	61.5	0.32	7.84	5	2.63	0.62	2.27	0.43	3.69	3.1	2.71	0.19	8	C. hartmaniorum
120	58.6	0.26	7.2	4	2.44	0.57	1.56	0.49	6.55	3.36	2.63	0.18	8	C. hartmaniorum
121	42.2	0.34	6.74	4	1.99	0.76	1.91	0.51	6.59	3.79	3.12	0.15	9	C. hartmaniorum
122	46.2	0.24	9.81	4	1.61	0.66	2.01	0.49	8.77	3.64	2.87	0.2	9	C. hartmaniorum
123	36.8	0.24	5.25	4	2.06	0.72	1.82	0.48	4.89	3.31	2.87	0.17	9	C. hartmaniorum
124	43.3	0.27	9.91	4	1.82	0.64	1.99	0.57	11.02	3.57	3.12	0.2	9	C. hartmaniorum
125	50.6	0.31	10.28	4	1.96	0.75	1.94	0.63	12.75	3.65	3.13	0.17	9	C. hartmaniorum
126	45.8	0.24	9.41	4	2.09	0.68	2.18	0.66	10.23	3.29	2.76	0.2	9	C. hartmaniorum
127	44.2	0.28	9.38	5	1.89	0.7	1.55	0.5	11.18	3.25	2.8	0.23	9	C. hartmaniorum
128	46.1	0.24	6.67	4	1.8	0.64	2.28	0.51	7.16	3.43	2.76	0.18	9	C. hartmaniorum
129	28.4	0.21	7.82	4	1.85	0.67	1.28	0.45	9.18	3.16	2.47	0.16	9	C. hartmaniorum
130	36.2	0.2	4.47	4	1.4	0.6	1.32	0.46	3.57	3.29	2.74	0.19	9	C. hartmaniorum
131	48.6	0.32	6.17	4	1.84	0.58	1.65	0.46	5.98	3.75	2.84	0.18	9	C. hartmaniorum
132	31.1	0.21	5.93	4	1.41	0.75	1.36	0.48	6.13	3.48	2.65	0.23	9	C. hartmaniorum
133	35.3	0.2	8.83	5	1.95	0.68	0.98	0.41	9.12	3.56	2.68	0.22	9	C. hartmaniorum
134	44.9	0.22	5.07	4	1.51	0.65	1.18	0.5	4.93	3.25	2.83	0.24	9	C. hartmaniorum
135	45.2	0.28	4.62	4	1.84	0.6	1.65	0.61	4.98	3.65	3.08	0.21	9	C. hartmaniorum
136	27.4	0.21	4.92	4	1.78	0.62	1.89	0.6	5.01	3.32	2.54	0.2	9	C. hartmaniorum
137	41.4	0.23	6.19	4	1.69	0.74	1.2	0.44	6.21	3.31	3.09	0.23	9	C. hartmaniorum
138	44.8	0.24	6.15	4	1.72	0.67	1.42	0.63	6.31	3.29	2.83	0.18	9	C. hartmaniorum
139	47.8	0.26	7.06	4	1.94	0.71	1.7	0.7	9.1	3.32	2.89	0.2	9	C. hartmaniorum
140	38.7	0.23	4.92	4	1.8	0.62	1.32	0.57	5.21	3.28	2.76	0.18	9	C. hartmaniorum
141	50.6	0.3	5.95	3	2.03	1.02	1.7	0.67	9.89	5.19	3.65	0.2	10	C. buxbaumii
142	49.6	0.27	6.39	4	1.34	0.96	1.5	0.68	12.01	5.78	3.84	0.21	10	C. buxbaumii
143	56.4	0.37	4.24	3	2.1	0.99	2.13	1.08	7.19	5.13	3.71	0.2	10	C. buxbaumii
144	49.7	0.31	3.06	3	1.4	0.92	1.23	0.9	3.88	5.92	3.99	0.23	10	C. buxbaumii
145	55.1	0.3	4.31	4	1.68	0.94	1.7	0.82	5.32	5.7	3.4	0.16	10	C. buxbaumii
146	55.7	0.26	3.32	3	1.79	0.8	1.29	0.68	3.95	5.73	3.39	0.15	10	C. buxbaumii
147	57.9	0.26	3.95	4	1.66	0.94	1.44	0.87	4.7	5.48	3.98	0.25	10	C. buxbaumii
148	51.5	0.27	4.9	4	2.13	0.92	1.69	0.79	7.83	4.91	3.88	0.21	10	C. buxbaumii
149	55.3	0.29	6.51	4	2.23	1	1.52	0.64	10.1	4.43	3.55	0.17	10	C. buxbaumii
150	43.7	0.31	3.89	3	1.92	1.06	1.55	0.78	5.48	4.69	3.61	0.14	10	C. buxbaumii
151	57.2	0.33	4.2	3	2.41	1	1.75	0.81	4.85	5.29	3.69	0.15	10	C. buxbaumii
152	64.4	0.3	4.18	4	2	1.06	1.57	0.7	5.31	5.23	3.34	0.15	10	C. buxbaumii
153	64.3	0.29	6.11	4	2.19	0.96	2.01	0.82	10.08	5.67	3.58	0.15	10	C. buxbaumii
154	58.1	0.37	4.48	3	2.39	0.88	1.78	0.86	4.82	5.34	3.72	0.18	10	C. buxbaumii
155	55.7	0.32	4.01	3	2.1	1	1.76	0.9	4.55	5.22	3.94	0.22	10	C. buxbaumii
156	55.8	0.36	3.49	3	2.14	0.8	1.65	0.71	4.66	5.2	3.71	0.17	10	C. buxbaumii
157	62.3	0.34	3.95	4	2.19	0.92	1.6	0.9	6.22	5.03	3.55	0.17	10	C. buxbaumii
158	60.2	0.3	3.31	3	1.97	1.01	1.84	0.86	4.13	6.59	4.04	0.3	10	C. buxbaumii
159	56.4	0.29	3.59	3	2.07	1	1.85	0.89	4.63	6.39	3.75	0.21	10	C. buxbaumii
160	56.6	0.26	3.91	4	2.06	0.88	1.52	0.7	4.25	4.79	3.76	0.17	10	C. buxbaumii
161	47.9	0.37	6.46	4	1.99	0.98	1.7	0.7	8.73	4.54	3.8	0.16	11	C. buxbaumii
162	47.3	0.35	4.56	3	1.7	0.87	1.46	0.61	5.56	4.85	3.82	0.13	11	C. buxbaumii
163	50.3	0.34	4.86	3	1.84	0.95	1.78	0.93	4.58	5.18	3.72	0.14	11	C. buxbaumii
164	50.9	0.33	5.31	4	2.01	0.9	2.07	0.7	7.1	4.58	3.61	0.1	11	C. buxbaumii
165	49.3	0.28	3.7	3	1.96	0.88	1.34	0.7	3.49	4.91	3.72	0.19	11	C. buxbaumii
166	51.8	0.32	6.27	4	1.98	0.94	1.97	0.67	9.02	5.58	3.84	0.13	11	C. buxbaumii
167	43.3	0.31	4.61	3	2.42	0.9	1.82	0.76	4.42	4.1	3.45	0.14	11	C. buxbaumii
168	50.6	0.37	4.32	3	1.88	0.87	1.39	0.78	4.63	5.31	3.85	0.2	11	C. buxbaumii
169	55.8	0.31	4.93	3	2.14	0.86	1.3	0.68	4.78	4.85	3.67	0.18	11	C. buxbaumii
170	50.5	0.25	4.44	3	1.72	0.86	1.35	0.72	5.24	4.61	3.83	0.16	11	C. buxbaumii
171	36.3	0.25	4.43	3	1.8	0.81	1.37	0.68	4.4	5.01	3.6	0.19	11	C. buxbaumii
172	47.2	0.32	5.1	3	1.94	0.93	1.32	0.83	6.22	5.6	3.92	0.18	11	C. buxbaumii
173	45.9	0.36	4.68	3	2.06	0.98	1.61	0.83	4.77	5.02	3.89	0.17	11	C. buxbaumii
174	44.2	0.28	3.57	3	1.42	0.84	1.05	0.82	3.75	4.82	3.82	0.16	11	C. buxbaumii
175	38.9	0.34	4.57	4	1.82	0.91	1.38	0.71	5.54	5.69	4.09	0.17	11	C. buxbaumii
176	65.6	0.25	5.38	4	1.87	0.84	1.88	0.8	6.64	5.47	3.86	0.22	11	C. buxbaumii
177	44.2	0.36	5.27	4	1.79	0.8	1.55	0.6	7.49	5.28	3.69	0.13	11	C. buxbaumii
178	44.7	0.39	4.1	3	2.22	0.85	1.86	0.71	4.73	4.92	3.75	0.19	11	C. buxbaumii
179	43.2	0.34	4.21	4	2.09	0.82	1.39	0.63	5.65	4.68	3.65	0.18	11	C. buxbaumii
180	42.1	0.33	3.77	3	2.04	0.79	1.63	0.72	3.49	4.62	3.59	0.13	11	C. buxbaumii
181	65.9	0.31	4.16	3	2.23	0.87	1.69	0.78	4.04	5.57	3.57	0.17	13	C. buxbaumii
182	54.2	0.3	5.04	3	2.28	0.7	1.67	0.8	5.46	4.4	3.65	0.16	13	C. buxbaumii
183	66.1	0.28	4.37	3	2.24	0.91	2.1	0.89	4.28	5.71	3.54	0.21	13	C. buxbaumii
184	79.6	0.37	5.13	4	2.45	0.86	2.28	0.87	6.38	5.89	4.05	0.21	13	C. buxbaumii
185	42.6	0.28	3.52	3	2.1	0.9	1.69	0.94	3.82	5.76	3.85	0.17	13	C. buxbaumii
186	48.1	0.27	5.09	4	2.19	0.87	1.98	0.76	5.11	4.4	3.3	0.16	13	C. buxbaumii
187	54.8	0.3	5.16	4	1.99	0.94	1.94	0.83	8.31	5.23	3.91	0.24	13	C. buxbaumii
188	42.7	0.29	4.74	3	2.05	0.89	2	0.72	6.42	4.47	3.73	0.24	13	C. buxbaumii
189	58.6	0.34	3.91	4	1.74	0.82	1.73	0.68	4.43	5.18	3.82	0.22	13	C. buxbaumii
190	47.6	0.24	4.95	4	1.83	0.99	1.96	0.78	5.25	5.22	3.68	0.2	13	C. buxbaumii
191	71.2	0.3	7.6	4	2.46	0.71	2.01	0.62	9.45	5.31	3.7	0.23	13	C. buxbaumii
192	51.8	0.29	3.91	3	1.67	0.98	1.6	0.72	3.51	5.16	3.57	0.2	13	C. buxbaumii
193	44.1	0.38	4.12	3	1.97	1.02	1.83	0.9	4.58	4.85	3.87	0.18	13	C. buxbaumii
194	45.4	0.35	4.02	3	2.02	0.92	1.96	0.89	4.32	4.91	3.64	0.22	13	C. buxbaumii
195	44.1	0.3	4.18	3	1.69	0.88	1.57	0.74	4.42	6.25	3.38	0.22	13	C. buxbaumii
196	40.3	0.31	4.91	4	2.12	0.89	1.26	0.72	5.49	5.96	3.64	0.22	13	C. buxbaumii
197	35.8	0.39	3.06	3	1.74	0.87	1.5	0.96	3.39	5.1	3.73	0.18	13	C. buxbaumii
198	40.9	0.34	5.09	4	1.71	0.86	1.83	0.88	5.77	5.09	3.93	0.23	13	C. buxbaumii
199	43.8	0.4	5.8	4	1.68	0.88	1.99	0.91	7.79	5.57	3.85	0.2	13	C. buxbaumii
200	51.6	0.32	3.89	3	2	1.03	1.73	0.77	3.12	4.8	3.51	0.2	13	C. buxbaumii
201	74.9	0.3	5.91	4	2.28	0.77	1.76	0.66	4.85	4.09	3.49	0.19	14	C. buxbaumii
202	72.3	0.28	9.72	3	2.71	0.75	2.18	0.7	12.74	4.02	3.77	0.22	14	C. buxbaumii
203	65.7	0.27	4.72	4	2.12	0.67	1.55	0.55	4.12	3.8	3.5	0.17	14	C. buxbaumii
204	68.9	0.25	5.75	4	2.3	0.75	1.74	0.56	7.06	3.81	3.53	0.2	14	C. buxbaumii
205	72.8	0.24	6.55	4	2	0.76	1.08	0.53	9.08	4.6	3.59	0.13	14	C. buxbaumii
206	67.6	0.27	5.38	4	2.14	0.72	1.48	0.52	4.21	3.56	3.1	0.11	14	C. buxbaumii
207	80.3	0.23	6.62	4	1.98	0.73	1.47	0.52	6.9	3.65	3.59	0.11	14	C. buxbaumii
208	75.1	0.25	4.47	3	2.24	0.7	1.51	0.54	3.26	3.59	3.61	0.13	14	C. buxbaumii
209	60.8	0.23	5.47	5	1.6	0.72	1.36	0.54	6.34	3.3	3.26	0.17	14	C. buxbaumii
210	68.2	0.23	5.88	4	2.09	0.81	1.37	0.52	6.47	4.08	3.64	0.19	14	C. buxbaumii
211	68.8	0.26	6.13	4	2.2	0.77	1.98	0.6	7.08	3.75	3.54	0.17	14	C. buxbaumii
212	66.3	0.26	7.51	4	2.37	0.62	1.5	0.6	7.28	3.69	3.55	0.15	14	C. buxbaumii
213	74.1	0.24	5.48	3	2.26	0.77	1.48	0.47	5.54	3.96	3.65	0.18	14	C. buxbaumii
214	65.2	0.24	7.63	4	2.03	0.6	1.51	0.5	9.43	3.56	3.74	0.23	14	C. buxbaumii
215	73.1	0.21	5.68	4	2.1	0.66	1.57	0.56	5.88	3.45	3.68	0.17	14	C. buxbaumii
216	67.3	0.26	9.27	3	2.19	0.75	1.66	0.48	11.01	4.08	3.7	0.23	14	C. buxbaumii
217	73.1	0.2	5.66	4	2.06	0.7	1.39	0.5	6.17	4.1	3.61	0.16	14	C. buxbaumii
218	64.5	0.27	4.59	3	2.03	0.66	1.47	0.51	4.4	3.95	3.65	0.18	14	C. buxbaumii
219	51.4	0.23	8.38	4	2.44	0.7	2.18	0.57	12.89	4.06	3.49	0.2	14	C. buxbaumii
220	70.7	0.21	5.87	4	1.96	0.64	1.59	0.53	6.95	3.49	3.53	0.19	14	C. buxbaumii
221	54.6	0.25	7.94	3	1.93	0.62	1.56	0.62	8.83	3.91	3.89	0.17	16	C. buxbaumii
222	75.1	0.25	9.74	4	1.86	0.8	1.71	0.78	11.29	4.86	3.82	0.22	16	C. buxbaumii
223	84.9	0.27	6.54	4	1.98	0.88	1.83	0.7	6.02	4.85	3.86	0.22	16	C. buxbaumii
224	52.2	0.27	4.56	4	1.6	0.87	1.64	0.79	4.47	4.98	3.88	0.24	16	C. buxbaumii
225	81.8	0.27	8.82	4	2.2	0.73	2.23	0.53	11.03	5.04	3.77	0.25	16	C. buxbaumii
226	63.2	0.29	6.18	4	2.09	0.87	1.42	0.7	6.98	4.71	3.75	0.21	16	C. buxbaumii
227	74.4	0.27	7.19	4	2.17	1	1.84	0.86	7.48	5.36	3.88	0.19	16	C. buxbaumii
228	66.3	0.27	10.25	5	2.22	0.76	2.23	0.74	12.39	4.61	3.77	0.21	16	C. buxbaumii
229	59.9	0.28	8.66	4	2.4	0.82	2.08	0.73	9.97	4.5	3.76	0.2	16	C. buxbaumii
230	70.9	0.28	6.17	4	1.97	0.87	1.89	0.76	6.69	4.99	3.78	0.2	16	C. buxbaumii
231	78.4	0.26	5.71	4	1.51	0.71	1.63	0.73	7.05	4.57	3.77	0.29	16	C. buxbaumii
232	72.1	0.23	4.99	3	1.91	0.81	1.35	0.79	5.03	3.91	3.42	0.2	16	C. buxbaumii
233	77.5	0.29	5.32	3	2.3	0.75	1.65	0.61	4.78	4.4	3.87	0.16	16	C. buxbaumii
234	82.1	0.27	9.4	4	2.29	0.79	1.7	0.68	11.47	4.48	3.99	0.19	16	C. buxbaumii
235	88.8	0.29	11.93	4	2.37	0.7	1.73	0.58	17.89	4.56	3.82	0.18	16	C. buxbaumii
236	87.5	0.26	6.72	3	2.39	0.82	1.76	0.67	5.51	4.59	3.91	0.17	16	C. buxbaumii
237	73.4	0.21	9.88	5	2.12	0.79	2.57	0.74	10.92	4.48	3.78	0.26	16	C. buxbaumii
238	75.9	0.25	6.69	4	1.7	0.86	1.61	0.69	9.68	4.46	3.71	0.2	16	C. buxbaumii
239	80.8	0.24	8.36	4	1.97	0.88	1.96	0.68	11.28	5.15	3.73	0.24	16	C. buxbaumii
240	81.9	0.3	7.94	4	2.48	0.73	2.18	0.63	9.31	4.7	3.83	0.19	16	C. buxbaumii
241	51.6	0.26	4.53	3	1.98	0.83	1.78	0.84	4.92	4.72	3.56	0.23	17	C. buxbaumii
242	71.1	0.23	6.76	4	2.1	0.91	1.23	0.4	11.12	4.75	3.51	0.2	17	C. buxbaumii
243	54.6	0.3	6.73	4	2.19	0.91	2.04	0.71	8.77	5.28	3.49	0.19	17	C. buxbaumii
244	59.8	0.31	5.24	3	2.42	0.85	1.75	0.75	6.55	4.8	3.62	0.25	17	C. buxbaumii
245	52.8	0.29	7.68	4	1.97	0.87	1.93	0.6	9.59	4.46	3.37	0.23	17	C. buxbaumii
246	59.1	0.29	8.97	4	2.38	0.87	2.26	0.76	12.06	4.68	3.36	0.2	17	C. buxbaumii
247	46.8	0.27	6.09	4	2.08	0.86	1.85	0.63	7.24	4.42	3.75	0.28	17	C. buxbaumii
248	57.6	0.26	4.74	4	1.8	0.86	1.14	0.75	5.07	3.7	3.71	0.19	17	C. buxbaumii
249	66.7	0.32	6.15	3	2.28	0.84	2.01	0.85	7.49	4.45	3.64	0.23	17	C. buxbaumii
250	64.1	0.32	6.4	4	2.13	0.88	2.18	0.75	8.22	4.61	3.46	0.26	17	C. buxbaumii
251	60.2	0.25	6.71	4	2.07	0.74	1.27	0.62	9.48	4.99	3.78	0.21	17	C. buxbaumii
252	49.4	0.27	5.37	4	2	0.84	1.43	0.69	5.94	4.45	3.26	0.18	17	C. buxbaumii
253	65.1	0.29	5.8	4	2.26	0.79	1.7	0.82	7.84	4.1	3.44	0.22	17	C. buxbaumii
254	53.9	0.32	10.47	4	2.36	0.82	1.88	0.52	14.19	4.16	3.2	0.21	17	C. buxbaumii
255	54.5	0.25	5.56	3	2.18	0.82	1.54	0.6	7.05	5.02	3.22	0.17	17	C. buxbaumii
256	58.6	0.27	5.93	4	1.9	0.88	1.4	0.61	7.03	4.45	3.79	0.2	17	C. buxbaumii
257	42.2	0.24	6.58	4	1.88	0.85	1.3	0.48	7.89	4.18	3.5	0.2	17	C. buxbaumii
258	49.3	0.27	5.98	4	1.86	0.82	1.51	0.56	8.03	4.29	3.44	0.16	17	C. buxbaumii
259	44.5	0.26	5.06	4	1.68	0.62	1.1	0.62	7.08	4.56	3.51	0.22	17	C. buxbaumii
260	55.1	0.28	7.14	4	2.21	0.72	1.49	0.57	8.93	4.48	3.46	0.23	17	C. buxbaumii
261	69.7	0.21	4.43	3	1.66	0.74	1.12	0.54	3.98	3.43	3.4	0.12	18	C. buxbaumii
262	67.1	0.23	6.28	4	1.76	0.76	1.37	0.55	6.18	3.35	3.62	0.16	18	C. buxbaumii
263	62.8	0.29	4.33	3	1.89	0.67	1.27	0.5	3.56	3.05	3.46	0.15	18	C. buxbaumii
264	68.5	0.26	5.71	3	1.93	0.64	1.27	0.54	5.43	3.51	3.26	0.15	18	C. buxbaumii
265	67.1	0.27	5.58	4	2.09	0.71	1.65	0.64	5.39	3.88	3.38	0.16	18	C. buxbaumii
266	76.3	0.25	5.88	3	2.14	0.68	1.34	0.65	5.78	3.78	3.43	0.16	18	C. buxbaumii
267	74.2	0.24	4.92	3	2	0.72	1.36	0.65	4.22	3.43	3.25	0.15	18	C. buxbaumii
268	73.9	0.22	3.93	3	1.92	0.6	1.19	0.56	3.02	3.16	3.46	0.15	18	C. buxbaumii
269	69.3	0.24	4.99	3	1.93	0.68	1.44	0.58	4.47	3.37	3.35	0.16	18	C. buxbaumii
270	64.8	0.25	6.88	3	1.83	0.73	1.21	0.53	9.19	3.6	3.57	0.19	18	C. buxbaumii
271	74.1	0.25	5.4	3	1.68	0.73	1.32	0.46	6.2	3.5	3.35	0.2	18	C. buxbaumii
272	75.1	0.27	5.91	3	2.01	0.75	1.63	0.57	5.33	3.75	3.57	0.14	18	C. buxbaumii
273	72.4	0.24	4.41	3	1.69	0.65	1.02	0.55	3.28	3.42	3.36	0.2	18	C. buxbaumii
274	76.5	0.24	5.06	3	1.92	0.72	1.32	0.6	4.17	3.44	3.25	0.17	18	C. buxbaumii
275	58.4	0.25	5.89	4	1.57	0.69	1.2	0.35	6.72	3.9	3.54	0.15	18	C. buxbaumii
276	66.1	0.28	5.43	3	1.84	0.67	1.26	0.56	5.22	4.05	3.75	0.2	18	C. buxbaumii
277	58.2	0.26	5.64	3	1.91	0.66	1.34	0.35	5.27	3.86	3.59	0.19	18	C. buxbaumii
278	75.4	0.28	8.52	4	1.64	0.78	1.5	0.56	13.06	3.49	3.2	0.14	18	C. buxbaumii
279	73.7	0.28	10.92	4	1.67	0.75	1.41	0.6	23.6	3.78	3.68	0.18	18	C. buxbaumii
280	76.2	0.31	9.09	4	1.74	0.71	1.58	0.63	16.21	3.69	3.3	0.17	18	C. buxbaumii
281	39.9	0.28	7.74	4	1.78	0.73	1.66	0.66	8.99	4.1	3.56	0.16	19	C. buxbaumii
282	51.2	0.27	4.15	3	1.85	0.84	1.5	0.66	4.2	4.09	3.59	0.22	19	C. buxbaumii
283	52.3	0.3	5.74	4	2.11	0.84	1.51	0.57	6.16	4.07	3.36	0.18	19	C. buxbaumii
284	52.5	0.28	4.93	4	1.72	0.78	2.01	0.6	6.07	4.11	3.47	0.2	19	C. buxbaumii
285	48.2	0.26	6.04	3	2.12	0.84	1.13	0.54	10.23	4.33	3.61	0.2	19	C. buxbaumii
286	47.9	0.24	4.27	3	1.74	0.74	1.24	0.53	3.53	4.31	3.74	0.2	19	C. buxbaumii
287	45.9	0.3	8.5	4	2.18	1.05	2.28	0.72	10.42	5.83	3.97	0.2	19	C. buxbaumii
288	48.9	0.25	4.38	3	2.08	1	1.46	0.69	4.15	4.26	3.91	0.22	19	C. buxbaumii
289	45.1	0.28	4.45	3	1.97	0.83	1.36	0.56	4.58	4.28	3.35	0.2	19	C. buxbaumii
290	53.1	0.32	4.63	4	1.82	0.84	1.73	0.78	5.01	4.39	3.59	0.17	19	C. buxbaumii
291	54.8	0.24	4.45	3	1.94	0.93	1.1	0.72	4.16	4.35	3.79	0.16	19	C. buxbaumii
292	29.2	0.27	6.83	4	1.78	0.83	1.65	0.72	8.6	4.72	3.49	0.21	19	C. buxbaumii
293	60.3	0.28	5.64	4	1.85	0.84	1.57	0.79	5.71	4.77	4.12	0.27	19	C. buxbaumii
294	56.4	0.28	6.08	4	2.04	0.8	1.45	0.52	6.89	4.44	3.79	0.24	19	C. buxbaumii
295	55.1	0.31	5.67	4	2.07	1	1.64	0.68	7.07	4.72	3.86	0.22	19	C. buxbaumii
296	58.1	0.29	4.46	3	2.1	0.91	1.38	0.67	4.2	4.61	3.8	0.21	19	C. buxbaumii
297	53.2	0.27	10.15	4	2.12	0.88	1.35	0.68	13.86	4.71	3.54	0.2	19	C. buxbaumii
298	49.4	0.28	7.33	4	1.79	0.87	1.57	0.71	8.21	4.46	3.59	0.18	19	C. buxbaumii
299	57.4	0.26	4.24	3	2.12	0.84	1.63	0.77	3.91	4.57	3.6	0.19	19	C. buxbaumii
300	52.7	0.26	6.5	3	2.34	0.88	1.2	0.58	7.52	4.66	3.64	0.19	19	C. buxbaumii
