# Supplementary material for: Morphological variability and genetic diversity in Carex buxbaumii and Carex hartmaniorum (Cyperaceae) populations
Source: PeerJ. 2021 May 11;9:e11372. doi: 10.7717/peerj.11372 (PMC8121068; doi:10.7717/peerj.11372)
Supplement: Supplemental Information 2 [file peerj-09-11372-s002.xlsx]

## Sheet: a) genetic similarity index(Si)
Population number	1	2	3	4	5	6	7	8	9	10	11	12	13	14	15	16	17	18	19
1	1	0.74	0.73367	0.77647	0.74419	0.75	0.68927	0.74118	0.80488	0.55319	0.55866	0.61728	0.56647	0.67708	0.54545	0.59036	0.63333	0.66332	0.61244
2	0.74	1	0.75536	0.72549	0.74757	0.64356	0.67299	0.72549	0.69697	0.49143	0.61972	0.57143	0.58937	0.63717	0.56497	0.59	0.54206	0.60086	0.58436
3	0.73367	0.75536	1	0.75862	0.69268	0.71642	0.67619	0.74877	0.71066	0.47126	0.56604	0.58462	0.58252	0.65778	0.52273	0.57286	0.57277	0.63793	0.61983
4	0.77647	0.72549	0.75862	1	0.76136	0.7907	0.76243	0.88506	0.83333	0.55172	0.61202	0.62651	0.62147	0.72449	0.57143	0.61176	0.57609	0.6601	0.61033
5	0.74419	0.74757	0.69268	0.76136	1	0.68966	0.65574	0.73864	0.71765	0.54422	0.55135	0.59524	0.55866	0.61616	0.56376	0.55814	0.55914	0.60488	0.56744
6	0.75	0.64356	0.71642	0.7907	0.68966	1	0.72626	0.77907	0.74699	0.54545	0.58564	0.60976	0.58286	0.72165	0.53793	0.57143	0.61538	0.67662	0.59716
7	0.68927	0.67299	0.67619	0.76243	0.65574	0.72626	1	0.78453	0.68571	0.48684	0.57895	0.53179	0.58696	0.63054	0.51948	0.55367	0.55497	0.64762	0.55455
8	0.74118	0.72549	0.74877	0.88506	0.73864	0.77907	0.78453	1	0.78571	0.53793	0.62295	0.60241	0.64407	0.68367	0.55782	0.61176	0.58696	0.64039	0.58216
9	0.80488	0.69697	0.71066	0.83333	0.71765	0.74699	0.68571	0.78571	1	0.51799	0.56497	0.6125	0.54971	0.64211	0.55319	0.54878	0.53933	0.61929	0.55072
10	0.55319	0.49143	0.47126	0.55172	0.54422	0.54545	0.48684	0.53793	0.51799	1	0.50649	0.52555	0.52703	0.50299	0.61017	0.62411	0.47742	0.47126	0.46739
11	0.55866	0.61972	0.56604	0.61202	0.55135	0.58564	0.57895	0.62295	0.56497	0.50649	1	0.59429	0.68817	0.62439	0.5641	0.58101	0.54922	0.54717	0.57658
12	0.61728	0.57143	0.58462	0.62651	0.59524	0.60976	0.53179	0.60241	0.6125	0.52555	0.59429	1	0.52071	0.71277	0.57554	0.55556	0.48864	0.59487	0.52683
13	0.56647	0.58937	0.58252	0.62147	0.55866	0.58286	0.58696	0.64407	0.54971	0.52703	0.68817	0.52071	1	0.57286	0.64	0.5896	0.62032	0.59223	0.62037
14	0.67708	0.63717	0.65778	0.72449	0.61616	0.72165	0.63054	0.68367	0.64211	0.50299	0.62439	0.71277	0.57286	1	0.52071	0.59375	0.64078	0.77333	0.68936
15	0.54545	0.56497	0.52273	0.57143	0.56376	0.53793	0.51948	0.55782	0.55319	0.61017	0.5641	0.57554	0.64	0.52071	1	0.64336	0.54777	0.5	0.53763
16	0.59036	0.59	0.57286	0.61176	0.55814	0.57143	0.55367	0.61176	0.54878	0.62411	0.58101	0.55556	0.5896	0.59375	0.64336	1	0.57778	0.59296	0.57416
17	0.63333	0.54206	0.57277	0.57609	0.55914	0.61538	0.55497	0.58696	0.53933	0.47742	0.54922	0.48864	0.62032	0.64078	0.54777	0.57778	1	0.6385	0.71749
18	0.66332	0.60086	0.63793	0.6601	0.60488	0.67662	0.64762	0.64039	0.61929	0.47126	0.54717	0.59487	0.59223	0.77333	0.5	0.59296	0.6385	1	0.64463
19	0.61244	0.58436	0.61983	0.61033	0.56744	0.59716	0.55455	0.58216	0.55072	0.46739	0.57658	0.52683	0.62037	0.68936	0.53763	0.57416	0.71749	0.64463	1

## Sheet: b) molecular variance 
Raw data for the evaluation of genetic variability for all populations analyzed in this study: a) values of genetic similarity index (Si) and b) data parameters for calculating the values of molecular variance (AMOVA) in the GenAIEx 6.5 software.
128	57	19	3	3	3	3	3	3	3	3	3	3	3	3	3	3	3	3	3	3	3	1	57
		842 primer																				834 primer																888 primer
Number of sample	Number of population	1449	1401	1388	1325	1103	1073	1028	943	908	876	772	688	628	574	520	495	440	399	343	260	2500	2109	1842	1746	1443	1216	1070	1029	917	855	790	700	549	511	426	364	1141	998	930	792	757	715	594	494	440	396	301	324
1	population 1	0	0	0	0	0	0	0	0	0	0	1	0	1	0	0	0	1	0	0	1	1	0	0	0	0	1	1	0	0	0	0	0	1	0	0	0	0	1	0	0	0	1	1	1	0	1	0	0
2	population 1	0	0	0	0	1	0	0	0	0	0	1	0	1	0	0	0	1	0	0	1	0	0	0	0	1	1	1	0	0	0	0	0	1	0	0	0	0	0	0	0	0	1	0	1	0	1	0	0
3	population 1	0	0	1	0	1	1	0	0	0	1	1	0	1	1	0	0	1	0	0	1	0	0	0	0	1	1	1	0	0	0	0	0	1	0	0	0	0	0	0	0	0	1	0	1	0	1	0	0
4	population 2	0	0	1	0	1	0	0	0	1	0	1	0	1	1	0	1	1	0	0	1	0	0	0	0	0	1	1	1	0	0	0	0	1	1	0	0	0	1	0	0	0	1	1	1	0	1	0	0
5	population 2	0	0	0	0	1	0	0	0	0	0	1	0	1	1	0	1	1	0	0	1	0	0	0	0	1	1	1	1	0	1	0	0	1	1	0	0	0	0	0	0	0	1	1	1	0	1	0	0
6	population 2	0	0	0	0	1	1	0	0	1	0	1	0	1	1	0	1	1	0	0	1	0	0	0	0	1	1	1	1	0	0	0	1	1	1	1	0	0	0	0	0	0	1	1	1	0	1	0	0
7	population 3	0	0	1	0	1	0	0	0	1	0	1	0	1	1	0	1	1	0	0	1	0	0	0	0	1	1	1	1	0	0	0	0	1	0	0	0	0	1	0	0	0	1	1	1	0	1	0	0
8	population 3	0	0	1	0	1	0	0	0	0	0	1	0	1	1	0	0	0	0	0	1	1	0	0	0	1	1	1	0	0	0	0	0	1	0	0	0	0	0	0	0	0	1	1	1	0	1	0	0
9	population 3	0	0	1	0	1	1	0	0	1	0	1	0	1	1	0	0	1	0	0	1	0	0	0	0	1	1	1	0	0	0	0	0	1	0	0	0	0	0	0	0	0	1	1	1	0	1	0	0
10	population 4	0	0	0	0	0	0	0	0	0	0	1	0	1	0	0	0	1	0	0	1	1	0	0	0	0	1	1	0	0	0	0	0	1	0	0	0	0	1	0	0	1	1	1	1	0	1	0	0
11	population 4	0	0	1	0	1	0	0	0	0	0	1	0	1	0	0	0	1	0	0	1	0	0	0	0	0	1	1	0	0	0	0	0	1	0	0	0	0	0	0	0	1	1	1	1	0	1	0	0
12	population 4	0	1	0	0	1	1	1	0	1	0	1	0	1	0	0	0	1	0	0	1	0	0	0	0	0	1	1	0	0	0	0	0	1	0	0	0	0	0	0	0	0	1	1	1	0	1	0	0
13	population 5	0	0	1	0	1	0	0	0	1	0	1	0	1	0	0	1	1	0	1	1	0	0	0	0	1	1	1	0	0	0	0	0	1	0	1	0	0	1	0	0	0	1	1	1	0	1	0	0
14	population 5	0	0	0	0	1	0	0	0	0	0	0	0	1	0	0	0	1	0	0	1	0	0	0	0	0	0	1	0	0	0	0	0	1	0	0	0	0	0	0	0	0	1	1	1	0	1	0	0
15	population 5	0	1	0	0	1	1	1	0	1	0	0	0	1	1	0	0	1	0	0	1	0	0	0	0	1	0	1	0	0	0	0	0	1	0	0	0	0	0	0	0	0	1	1	1	0	1	0	0
16	population 6	0	0	0	0	0	0	0	0	0	0	1	0	1	0	0	0	1	0	0	1	1	0	0	0	1	1	1	0	0	0	0	0	1	0	0	0	1	1	0	0	1	1	1	1	0	1	0	0
17	population 6	0	0	0	0	1	0	0	0	0	0	1	0	1	0	0	0	1	0	0	1	0	0	0	0	1	1	1	0	0	0	0	0	1	0	0	0	0	0	0	0	0	1	1	1	0	1	0	0
18	population 6	0	1	0	0	1	1	0	0	0	0	1	0	1	0	0	0	0	0	0	0	0	0	0	0	0	0	1	0	0	0	0	0	1	0	0	0	0	0	0	0	0	1	0	1	0	1	0	0
19	population 7	0	0	1	0	1	0	0	0	0	0	1	0	1	0	0	0	1	0	0	1	1	0	0	0	1	1	1	0	0	0	0	0	1	1	0	0	0	1	0	0	0	1	1	1	0	1	0	0
20	population 7	0	0	0	0	0	0	0	0	0	0	1	0	1	0	0	0	1	0	0	1	0	0	0	0	1	1	1	0	0	0	0	0	1	0	0	0	0	0	0	0	0	1	0	1	0	1	0	0
21	population 7	0	1	0	0	1	1	0	0	1	0	1	0	1	0	0	0	1	0	0	1	0	0	0	0	1	1	1	0	0	0	0	0	1	0	0	0	0	0	0	0	0	1	0	1	0	1	0	0
22	population 8	0	0	0	0	1	0	0	0	0	0	1	0	1	0	0	0	1	0	0	1	0	0	0	0	1	1	1	0	0	0	0	0	1	1	0	0	0	1	0	0	0	1	1	1	1	1	0	1
23	population 8	0	0	1	0	1	0	0	0	0	0	1	0	1	0	0	0	1	0	0	1	0	0	0	0	0	1	1	0	0	0	0	0	0	0	0	0	0	0	0	0	0	1	1	1	0	1	0	0
24	population 8	0	1	0	0	1	1	0	0	1	0	1	0	1	0	0	0	0	0	0	1	0	0	0	0	0	1	1	0	0	0	0	0	1	0	0	0	0	0	0	0	0	1	1	1	0	1	0	0
25	population 9	0	0	0	0	0	0	0	0	0	0	1	0	1	0	0	0	0	0	0	1	0	0	0	0	0	1	1	0	0	0	0	0	1	0	0	0	0	1	1	0	0	1	1	1	0	1	0	0
26	population 9	0	0	1	0	1	0	0	0	0	0	1	0	1	0	0	0	0	0	0	1	1	0	0	0	1	1	1	0	0	0	0	0	1	0	0	0	0	0	0	0	0	1	1	1	0	1	0	0
27	population 9	0	1	0	0	1	1	1	0	1	0	1	0	1	0	0	0	1	0	0	1	1	0	0	0	0	1	1	0	0	0	0	0	1	0	0	0	0	0	0	0	0	1	1	1	0	1	0	0
28	population 10	1	0	0	0	0	0	0	0	0	0	1	0	0	0	0	0	1	0	0	1	0	0	0	0	0	0	1	0	0	0	0	0	1	0	0	0	0	1	0	0	0	1	1	1	0	1	0	0
29	population 10	0	0	0	0	1	0	0	0	0	0	1	0	0	0	0	0	0	0	0	1	0	0	0	0	0	0	1	0	0	0	0	0	1	1	0	0	0	0	0	0	0	0	0	1	0	1	1	1
30	population 10	0	0	0	0	0	0	0	0	0	0	1	0	0	0	0	0	0	0	0	1	0	0	0	0	0	0	1	0	0	0	0	0	1	0	0	0	0	0	0	0	0	1	0	1	0	1	0	0
31	population 11	0	0	0	0	1	0	1	0	0	0	1	1	1	1	0	0	1	0	0	1	0	0	0	0	0	1	1	0	1	1	0	0	1	0	0	0	0	1	0	0	0	1	1	1	0	1	0	0
32	population 11	0	0	0	0	0	0	0	0	0	1	1	0	0	0	1	0	1	1	0	1	0	0	0	1	0	1	1	0	0	1	0	0	1	0	0	0	0	0	1	1	0	1	1	1	0	1	0	0
33	population 11	0	0	0	0	0	0	0	0	1	0	1	0	0	0	1	0	0	0	0	0	0	0	0	0	0	0	0	0	0	0	0	0	1	0	0	0	0	0	0	0	0	1	0	1	0	1	0	0
34	population 12	0	0	0	0	1	0	1	1	0	0	1	1	1	0	0	0	1	0	0	1	0	0	0	0	0	1	1	1	0	1	1	0	1	0	0	0	0	0	0	0	0	1	1	1	0	1	0	0
35	population 12	0	0	0	0	1	0	1	0	0	0	1	1	1	0	0	0	0	0	0	1	0	0	0	0	0	0	1	0	0	0	0	0	1	0	0	0	0	0	0	0	0	1	1	1	0	1	0	0
36	population 12	0	0	0	0	1	0	0	0	0	0	1	1	1	0	0	0	1	0	0	1	0	0	0	0	0	0	0	0	0	0	0	0	1	0	0	0	0	0	0	0	0	0	0	1	0	1	0	0
37	population 13	0	0	0	0	0	0	0	0	0	1	1	0	0	0	1	0	1	1	0	1	0	0	0	1	1	1	1	0	0	1	1	0	1	0	0	0	0	0	0	1	0	1	1	1	0	1	0	0
38	population 13	0	0	0	0	0	0	0	0	0	1	1	0	0	0	1	0	0	1	0	1	0	0	0	1	0	1	1	0	0	1	0	0	0	0	0	0	0	0	0	0	0	1	1	1	0	1	0	0
39	population 13	0	0	0	0	0	0	0	0	0	1	1	0	0	0	1	0	0	0	0	0	0	0	0	0	0	1	1	0	0	0	0	0	1	0	0	0	0	0	0	0	0	1	0	1	0	1	0	0
40	population 14	0	0	0	0	0	0	1	0	0	0	1	1	1	0	0	0	1	0	0	1	1	1	0	0	0	1	1	0	0	1	0	0	1	0	0	0	0	0	0	0	0	1	1	1	0	1	0	0
41	population 14	0	0	0	0	1	0	1	1	0	0	1	1	1	0	0	0	1	0	0	1	0	0	0	0	0	1	1	1	0	1	0	0	1	0	0	0	0	0	0	0	0	1	0	1	0	1	0	0
42	population 14	0	0	0	0	1	0	1	0	0	0	1	1	1	0	0	0	1	0	0	1	0	0	0	0	0	0	1	0	0	1	0	0	1	0	0	0	0	0	0	0	0	1	0	1	0	1	0	0
43	population 15	0	0	0	0	0	0	0	0	0	0	1	0	0	0	0	0	0	0	0	1	0	0	0	0	0	0	1	0	0	1	0	0	1	0	0	0	0	0	0	0	0	1	0	1	0	1	0	0
44	population 15	0	0	0	0	0	0	0	0	0	0	1	0	0	0	0	0	0	0	0	1	0	0	0	0	0	0	1	0	0	1	0	0	0	0	0	0	0	0	0	0	0	1	1	1	0	1	0	0
45	population 15	1	0	0	0	0	0	0	0	0	0	1	0	0	1	0	0	1	0	0	1	0	0	0	0	0	0	0	0	0	0	0	0	1	0	0	0	0	0	0	0	1	0	0	1	0	1	0	0
46	population 16	1	0	0	1	0	0	0	0	0	0	1	1	0	1	0	0	1	0	1	1	0	0	0	0	0	1	1	0	0	1	1	0	1	0	0	0	0	0	0	0	0	1	1	1	0	1	0	0
47	population 16	0	0	0	0	0	0	0	0	0	0	1	0	0	0	0	0	1	0	0	1	0	0	0	0	0	1	1	0	0	1	0	0	0	0	0	0	0	0	0	0	0	1	1	1	0	1	0	0
48	population 16	0	0	0	0	0	0	0	0	0	0	1	1	0	0	0	0	0	0	0	1	0	0	0	0	0	0	1	0	0	1	0	1	1	0	0	0	0	0	0	0	0	0	0	1	0	0	0	0
49	population 17	0	0	0	0	0	0	1	0	0	0	1	0	1	0	1	0	0	0	0	1	0	0	0	0	1	0	1	0	0	1	0	0	1	0	1	1	0	0	0	0	0	1	1	1	0	1	0	1
50	population 17	0	0	0	0	0	0	0	0	0	1	1	0	0	0	0	0	1	0	0	1	0	0	0	0	1	0	1	0	0	1	0	0	0	0	0	0	0	0	0	0	0	1	0	1	0	1	0	0
51	population 17	1	0	0	0	0	0	0	0	0	1	1	1	0	0	0	0	1	0	0	0	0	0	0	0	0	0	1	0	0	1	0	0	1	0	0	0	0	0	0	0	0	1	0	1	0	1	0	0
52	population 18	0	0	0	0	0	0	0	0	0	0	1	1	0	0	0	0	1	0	0	1	0	0	0	1	1	1	1	0	0	1	0	0	1	0	0	0	0	1	0	1	0	1	1	1	0	1	0	0
53	population 18	0	0	0	0	0	0	0	0	0	0	1	1	0	0	0	0	1	0	0	1	0	0	0	0	1	1	1	0	0	1	0	0	0	0	0	0	0	0	0	0	0	1	0	1	0	1	0	0
54	population 18	0	1	0	0	0	1	1	1	0	0	1	1	1	0	0	0	1	0	0	1	0	0	0	0	0	1	1	0	0	1	0	0	1	0	0	0	0	0	0	0	0	1	0	1	0	1	0	0
55	population 19	0	0	0	0	0	0	1	0	0	1	1	0	1	0	1	0	0	1	0	1	0	0	1	0	0	1	1	0	0	1	0	0	1	0	1	1	0	0	0	0	0	1	1	1	0	1	0	0
56	population 19	1	0	0	0	0	0	1	0	0	1	1	0	0	0	0	0	1	0	0	1	0	0	0	1	0	1	1	0	0	1	0	0	1	0	0	0	0	0	0	1	0	1	1	1	0	1	0	0
57	population 19	1	0	0	0	0	0	0	0	0	1	1	0	1	1	0	0	1	0	0	0	0	0	0	0	1	1	1	1	0	1	1	0	1	0	0	0	0	0	0	0	0	1	1	1	0	1	0	0
[truncated: 80 more columns]
